# Supplementary material for: A biochemically-interpretable machine learning classifier for microbial GWAS
Source: PubMed Central journal article supplement (PMC7244534; doi:10.1038/s41467-020-16310-9), 2020-05-22
Supplement: 41467_2020_16310_MOESM10_ESM.pdf [file 41467_2020_16310_MOESM10_ESM.pdf]

**Title:** Supplementary Data File 1

**Description:** Excel sheets contained curated information for TB AMR genes and alleles.

**Title:** Supplementary Data File 2

**Description:** Dataframe for curated gene-pathway annotations.

**Title:** Supplementary Data File 3

**Description:** Excel sheets for pyrazinamide MAC characteristics.

**Title:** Supplementary Data File 4

**Description:** Excel sheets for 4-aminosalicylic acid MAC characteristics.

**Title:** Supplementary Data File 5

**Description:** Excel sheets for isoniazid MAC characteristics.

**Title:** Supplementary Data File 6

**Description:** Conventional results. Excel sheets describing bonferroni-corrected allele-AMR ANOVA F-tests and FDR-corrected pathway enrichments for isoniazid, pyrazinamide, and 4-aminosalicylic acid.
